# Supplementary material for: Base Pairing Interaction between 5′- and 3′-UTRs Controls icaR mRNA Translation in Staphylococcus aureus
Source: PubMed Central journal article supplement (PMC3868564; doi:10.1371/journal.pgen.1004001), 2013-12-19

Full length *icaR* mRNA

M 1 2 3 4

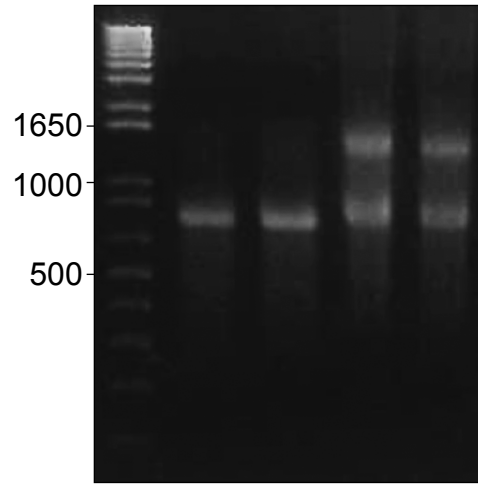

Supplement: pgen.1004001.s005.pdf [file pgen.1004001.s005.pdf]
