# Supplementary material for: Base Pairing Interaction between 5′- and 3′-UTRs Controls icaR mRNA Translation in Staphylococcus aureus
Source: PubMed Central journal article supplement (PMC3868564; doi:10.1371/journal.pgen.1004001), 2013-12-19
Supplement: pgen.1004001.s008.pdf [file pgen.1004001.s008.pdf]

**Table S1. Strains used in this study.**

| Strains                                                          | Relevant characteristic(s)                                                                                                     | MIC <sup>a</sup> | Source or reference <sup>b</sup> |
|------------------------------------------------------------------|--------------------------------------------------------------------------------------------------------------------------------|------------------|----------------------------------|
| <i>Staphylococcus aureus</i>                                     |                                                                                                                                |                  |                                  |
| 15981                                                            | Clinical strain. Biofilm positive in TSBg                                                                                      | 532              | [1]                              |
| MW2                                                              | Typical community-acquired strain of MRSA, which was isolated in 1998 in North Dakota, USA.                                    | 3566             | NRS123, [2]                      |
| RN10359                                                          | RN450 lysogenic for 80 $\alpha$ phage                                                                                          | 3337             | [3]                              |
| ISP479r                                                          | ISP479c with <i>rsbU</i> gene restored                                                                                         | 1680             | [4]                              |
| 132                                                              | MRSA clinical strain with the capacity to form proteinaceous biofilm in TSB-glucose and PIA-PNAG-dependent biofilm in TSB-NaCl | 29               | [5]                              |
| 15981 $\Delta$ 3'-UTR                                            | 15981 strain with deletion in the <i>icaR</i> 3' UTR                                                                           | 2695             | This study                       |
| 132 $\Delta$ 3'-UTR                                              | 132 strain with deletion in the <i>icaR</i> 3' UTR                                                                             | 3661             | This study                       |
| 15981 <sup>FLAG</sup> IcaR                                       | 15981 strain expressing the 3XFLAG tagged IcaR protein from the chromosome                                                     | 2653             | This study                       |
| 15981 <sup>FLAG</sup> IcaR $\Delta$ 3'-UTR                       | 15981 $\Delta$ 3'-UTR strain expressing the 3XFLAG tagged IcaR protein from the chromosome                                     | 2649             | This study                       |
| 15981 pCN40                                                      | 15981 strain carrying the pCN40 plasmid                                                                                        | 1014             | This study                       |
| 15981 p <sup>FLAG</sup> IcaRm                                    | 15981 strain carrying the p <sup>FLAG</sup> IcaRm plasmid                                                                      | 2683             | This study                       |
| 15981 p <sup>FLAG</sup> IcaRm $\Delta$ 3'UTR                     | 15981 strain carrying the p <sup>FLAG</sup> IcaRm $\Delta$ 3'UTR plasmid                                                       | 2684             | This study                       |
| 15981 p <sup>FLAG</sup> IcaRm $\Delta$ anti-SD                   | 15981 strain carrying the p <sup>FLAG</sup> IcaRm $\Delta$ anti-SD plasmid                                                     | 4392             | This study                       |
| 15981 p <sup>FLAG</sup> IcaRm-SUBST                              | 15981 strain carrying the p <sup>FLAG</sup> IcaRm-SUBST-anti-SD plasmid                                                        | 4395             | This study                       |
| 15981 pIcaRm                                                     | 15981 strain carrying the pIcaRm plasmid                                                                                       | 1011             | This study                       |
| 15981 pIcaRm $\Delta$ 3'UTR                                      | 15981 strain carrying the pIcaRm $\Delta$ 3'UTR plasmid                                                                        | 1012             | This study                       |
| 15981 pIcaRm $\Delta$ anti-SD                                    | 15981 strain carrying the pIcaRm $\Delta$ anti-SD plasmid                                                                      | 4391             | This study                       |
| 15981 pIcaRm-SUBST                                               | 15981 strain carrying the pIcaRm-SUBST-anti-SD plasmid                                                                         | 4394             | This study                       |
| 15981 $\Delta$ <i>rnc::cat86</i>                                 | 15981 strain with deletion in the <i>rnc</i> gene                                                                              | 1327             | [6]                              |
| 15981 $\Delta$ <i>pnp</i>                                        | 15981 strain with deletion in the <i>pnp</i> gene                                                                              | 1100             | [6]                              |
| 15981 $\Delta$ <i>yqfR</i>                                       | 15981 strain with deletion in the <i>SA1387</i> gene which encodes a DEAD-box RNA helicase                                     | 1394             | This study                       |
| 15981 $\Delta$ <i>hfq::cat86</i>                                 | 15981 strain with deletion in the <i>hfq</i> gene                                                                              | 1055             | This study                       |
| 15981 $\Delta$ <i>rnc</i> p <sup>FLAG</sup> IcaRm                | 15981 $\Delta$ <i>rnc::cat86</i> strain carrying the p <sup>FLAG</sup> IcaRm plasmid                                           | 2706             | This study                       |
| 15981 $\Delta$ <i>rnc</i> p <sup>FLAG</sup> IcaRm $\Delta$ 3'UTR | 15981 $\Delta$ <i>rnc::cat86</i> strain carrying the p <sup>FLAG</sup> IcaRm $\Delta$ 3'UTR plasmid                            | 2707             | This study                       |
| 15981 $\Delta$ <i>rnc</i> p <sup>FLAG</sup> IcaRm-SUBST          | 15981 $\Delta$ <i>rnc::cat86</i> strain carrying the p <sup>FLAG</sup> IcaRm-SUBST-anti-SD plasmid                             | 4970             | This study                       |
| 15981 $\Delta$ <i>yqfR</i> p <sup>FLAG</sup> IcaRm               | 15981 $\Delta$ <i>yqfR</i> strain carrying the p <sup>FLAG</sup> IcaRm plasmid                                                 | 2704             | This study                       |
| 15981 $\Delta$ <i>hfq</i> p <sup>FLAG</sup> IcaRm                | 15981 $\Delta$ <i>hfq::cat86</i> strain carrying the p <sup>FLAG</sup> IcaRm plasmid                                           | 2708             | This study                       |
| 15981 pSA14-PicaA53                                              | 15981 strain carrying the pSA14-PicaA53 plasmid                                                                                | 1449             | This study                       |
| <i>Escherichia coli</i> strains                                  |                                                                                                                                |                  |                                  |
| XL1 Blue                                                         | Used for cloning experiments                                                                                                   |                  | Stratagene                       |
| XL1 Blue pCN40                                                   | XL1Blue carrying the pCN40 plasmid from RN9594 (NRS594)                                                                        | 2648             | This study                       |
| BL21(DE3) <i>rnc105</i>                                          | BL21(DE3) <i>rnc105 recA</i>                                                                                                   | 4848             | [7]                              |
| BL21 pET-15b RNase III                                           | BL21(DE3) <i>rnc105 recA</i> strain carrying the pET-15b expressing the <i>S. aureus</i> RNase III fused to His-tag            | 4767             | This study                       |

<sup>a</sup>Microbial Biofilm Laboratory strain collection number.

<sup>b</sup>References

1. Valle J, Toledo-Arana A, Berasain C, Ghigo J-M, Amorena B, et al. (2003) SarA and not sigmaB is essential for biofilm development by *Staphylococcus aureus*. Mol Microbiol 48: 1075–1087.
2. Baba T, Takeuchi F, Kuroda M, Yuzawa H, Aoki K-I, et al. (2002) Genome and virulence determinants of high virulence community-acquired MRSA. Lancet 359: 1819–1827.
3. Ubeda C, Barry P, Penadés JR, Novick RP (2007) A pathogenicity island replicon in *Staphylococcus aureus* replicates as an unstable plasmid. Proc Natl Acad Sci USA 104: 14182–14188.
4. Toledo-Arana A, Merino N, Vergara-Irigaray M, Débarbouillé M, Penadés JR, et al. (2005) *Staphylococcus aureus* develops an alternative, *ica*-independent biofilm in the absence of the *arlRS* two-component system. Journal of Bacteriology 187: 5318–5329.
5. Vergara-Irigaray M, Valle J, Merino N, Latasa C, García B, et al. (2009) Relevant role of fibronectin-binding proteins in *Staphylococcus aureus* biofilm-associated foreign-body infections. Infection and Immunity 77: 3978–3991.
6. Lasa I, Toledo-Arana A, Dobin A, Villanueva M, de los Mozos IR, et al. (2011) Genome-wide antisense transcription drives mRNA processing in bacteria. Proc Natl Acad Sci USA 108: 20172–20177.
7. Amarasinghe AK, Calin-Jageman I, Harmouch A, Sun W, Nicholson AW (2001) *Escherichia coli* ribonuclease III: affinity purification of hexahistidine-tagged enzyme and assays for substrate binding and cleavage. Meth Enzymol 342: 143–158.
