# Supplementary material for: Base Pairing Interaction between 5′- and 3′-UTRs Controls icaR mRNA Translation in Staphylococcus aureus
Source: PubMed Central journal article supplement (PMC3868564; doi:10.1371/journal.pgen.1004001), 2013-12-19
Supplement: pgen.1004001.s009.pdf [file pgen.1004001.s009.pdf]

**Table S2. Plasmids used in this study.**

| Plasmids                                 | Relevant characteristic(s)                                                                                                                                                                                                                                                                                             | Source or reference <sup>a</sup> |
|------------------------------------------|------------------------------------------------------------------------------------------------------------------------------------------------------------------------------------------------------------------------------------------------------------------------------------------------------------------------|----------------------------------|
| pMAD                                     | <i>E. coli</i> - <i>S. aureus</i> shuttle vector with a thermosensitive origin of replication for Gram-positive bacteria. The vector contains the <i>bgab</i> gene encoding a $\beta$ -galactosidase under the control of a constitutive promoter as reporter of plasmid presence. Ap <sup>R</sup> , Em <sup>R</sup> . | [1]                              |
| pMAD $\Delta$ 3'UTR                      | pMAD plasmid containing the mutant allele for deletion of the long 3'-UTR of the <i>icaR</i> mRNA                                                                                                                                                                                                                      | This study                       |
| pMAD 3xFLAG- <i>icaR</i>                 | pMAD plasmid containing the allele for insertion of the 3xFLAG at the N-terminus of the IcaR protein                                                                                                                                                                                                                   | This study                       |
| pMAD $\Delta$ SA1387                     | pMAD plasmid containing the allele for deletion of the DEAD-box RNA helicase ( <i>S. aureus</i> N315 ID: SA1387)                                                                                                                                                                                                       | This study                       |
| pLUG533                                  | pMAD derivative for deletion/replacement of <i>S. aureus</i> <i>hfq</i> gene                                                                                                                                                                                                                                           | [2]                              |
| pSA14                                    | <i>E. coli</i> - <i>S. aureus</i> shuttle vector for transcriptional LacZ reporter fusions. The plasmid carries the promoterless <i>Escherichia coli lacZ</i> gene downstream from the <i>Bacillus subtilis spoVG</i> ribosome binding site.                                                                           | [3]                              |
| pSA14- <i>Pica</i>                       | pSA14 plasmid carrying the <i>ica</i> operon promoter region from -422 to +1, where +1 corresponds to the mapped transcriptional start site of <i>icaADBC</i> mRNA                                                                                                                                                     | This study                       |
| pCN40                                    | <i>E. coli</i> - <i>S. aureus</i> shuttle vector to express genes under the control of the <i>P<sub>biaZ</sub></i> constitutive promoter. Low copy number (20 to 25 copies/cell). Em <sup>R</sup>                                                                                                                      | [4]                              |
| p <sup>FLAG</sup> IcaRm                  | pCN40 plasmid constitutively expressing the N-terminal 3XFLAG tagged IcaR protein from the entire mRNA                                                                                                                                                                                                                 | This study                       |
| p <sup>FLAG</sup> IcaRm $\Delta$ 3'UTR   | pCN40 plasmid constitutively expressing the N-terminal 3XFLAG tagged IcaR protein from the mRNA carrying a deletion of 331 nt downstream of the stop codon                                                                                                                                                             | This study                       |
| p <sup>FLAG</sup> IcaRm $\Delta$ anti-SD | pCN40 plasmid constitutively expressing the N-terminal 3XFLAG tagged IcaR protein from the mRNA carrying the UCCCCUG deletion                                                                                                                                                                                          | This study                       |
| p <sup>FLAG</sup> IcaRm-SUBST            | pCN40 plasmid constitutively expressing the N-terminal 3XFLAG tagged IcaR protein from the mRNA carrying the substitution of the UCCCCUG motif by AGGGGAC                                                                                                                                                              | This study                       |
| pIcaRm                                   | pCN40 plasmid constitutively expressing the entire <i>icaR</i> mRNA molecule                                                                                                                                                                                                                                           | This study                       |
| pIcaRm $\Delta$ 3'UTR                    | pCN40 plasmid constitutively expressing the <i>icaR</i> mRNA carrying a deletion of 331 nt downstream of the stop codon                                                                                                                                                                                                | This study                       |
| pIcaRm $\Delta$ anti-SD                  | pCN40 plasmid constitutively expressing the entire <i>icaR</i> mRNA carrying the UCCCCUG deletion                                                                                                                                                                                                                      | This study                       |
| pIcaRm-SUBST                             | pCN40 plasmid constitutively expressing the <i>icaR</i> mRNA carrying the substitution of the UCCCCUG motif by AGGGGAC                                                                                                                                                                                                 | This study                       |
| pIcaRm-Compensatory                      | pCN40 plasmid constitutively expressing the <i>icaR</i> mRNA carrying the substitution of the UCCCCUG motif by AGGGGAC and the substitution of the SD region (CAGGGGG) by GTCCCCCT                                                                                                                                     | This study                       |
| pET-15b RNase III                        | pET-15b expressing the <i>S. aureus</i> <i>rnc</i> gene which encodes the double stranded endoribonuclease RNase III fused to His-tag.                                                                                                                                                                                 | This study                       |
| pUT7- <i>spa</i>                         | T7 promoter- <i>spa</i> (nts -25 to +200) allowing the <i>in vitro</i> T7 transcription of <i>S. aureus spa</i> mRNA containing the whole 5'-UTR and 200 nts of the coding sequence                                                                                                                                    | [5]                              |
| pUT7- <i>icaR</i>                        | T7 promoter- <i>icaR</i> allowing the <i>in vitro</i> T7 transcription of the full-length <i>icaR</i> mRNA                                                                                                                                                                                                             | This study                       |

<sup>a</sup>References

1. Arnaud M, Chastanet A, Débarbouillé M (2004) New vector for efficient allelic replacement in naturally nontransformable, low-GC-content, Gram-positive bacteria. *Applied and Environmental Microbiology* 70: 6887–6891.
2. Boisset S, Geissmann T, Huntzinger E, Fechter P, Bendridi N, et al. (2007) *Staphylococcus aureus* RNAlIIII coordinately represses the synthesis of virulence factors and the transcription regulator Rot by an antisense mechanism. *Genes & Development* 21: 1353–1366.
3. Joanne P, Falord M, Chesneau O, Lacombe C, Castano S, et al. (2009) Comparative study of two plasticins: specificity, interfacial behavior, and bactericidal activity. *Biochemistry* 48: 9372–9383.
4. Charpentier E, Anton AI, Barry P, Alfonso B, Fang Y, et al. (2004) Novel cassette-based shuttle vector system for Gram-positive bacteria. *Applied and Environmental Microbiology* 70: 6076–6085.
5. Huntzinger E, Boisset S, Saveanu C, Benito Y, Geissmann T, et al. (2005) *Staphylococcus aureus* RNAlIIII and the endoribonuclease III coordinately regulate *spa* gene expression. *EMBO J* 24: 824–835.
