# Supplementary material for: Base Pairing Interaction between 5′- and 3′-UTRs Controls icaR mRNA Translation in Staphylococcus aureus
Source: PubMed Central journal article supplement (PMC3868564; doi:10.1371/journal.pgen.1004001), 2013-12-19
Supplement: pgen.1004001.s010.pdf [file pgen.1004001.s010.pdf]

**Table S3. Oligonucleotides used in this study.**

| Oligonucleotide                                                                                        | Sequence                                                                                       |
|--------------------------------------------------------------------------------------------------------|------------------------------------------------------------------------------------------------|
| <b>mRACE for simultaneous mapping of transcriptional start and stop sites</b>                          |                                                                                                |
| RACE-IcaR-1                                                                                            | TATCATCAAGTGTGTACCGTCAT                                                                        |
| RACE-IcaR-2                                                                                            | TCAAAGATGAAGTGATTCGCTAC                                                                        |
| <b>Northern blot probes</b>                                                                            |                                                                                                |
| NB-IcaR-Sense                                                                                          | AGCTATATCATCAAGTGTGTACCGTCATACCCCTTCTCTG                                                       |
| 400-Sense                                                                                              | TGTAATTAGATGACAACCTATTCTTTTCAGGGGAAC                                                           |
| RP-T7-Sense-IcaR                                                                                       | <u>TAATACGACTCACTATAGGGTACTTTCTTCCACTGCTCCA</u>                                                |
| IcaR+1 (BamHI)                                                                                         | GGATCCGAAATATTTGTAATTGCA                                                                       |
| <b>Deletion of <i>icaR</i> 3'-UTR</b>                                                                  |                                                                                                |
| IcaR-A (EcoRI)                                                                                         | GAATTCTTTTCAGAGAAGGGGTATGACG                                                                   |
| IcaR-B (Sall)                                                                                          | GTCGACCAAAAATTATTTCTTCAAAAATAT                                                                 |
| IcaR-C (Sall)                                                                                          | GTCGACTAATTATTGATAAGCGCCTA                                                                     |
| IcaR-D (BamHI)                                                                                         | GGATCCAACGACCACAAAACATACACAA                                                                   |
| IcaR-E                                                                                                 | GAGTAGAAGCAGTATATTTGT                                                                          |
| IcaR-F                                                                                                 | AAATAGAGTGAAGACACCC                                                                            |
| <b>Deletion of <i>dbpA</i> gene</b>                                                                    |                                                                                                |
| SA1387-A (BamHI)                                                                                       | GGATCCTCTTATCTTCACCAACATAA                                                                     |
| SA1387-B (HindIII)                                                                                     | AAGCTTGTGTGTTTTATGTTATTAGG                                                                     |
| SA1387-C (HindIII)                                                                                     | AAGCTTATTTGGCCTCCTTATATGT                                                                      |
| SA1387-D (BamHI)                                                                                       | GGATCCCTTTGAAAGTGAAGGAAGA                                                                      |
| SA1387-E                                                                                               | ACAGTAATGTTTACGACTCA                                                                           |
| SA1387-F                                                                                               | GTAGTGATAAAGCGACATTA                                                                           |
| <b>mRNA levels quantification by qRT-PCR</b>                                                           |                                                                                                |
| icaC2.SG-5                                                                                             | TGCGTTAGCAAATGGAGACTATTG                                                                       |
| icaC2.SG-3                                                                                             | TGAGAAAGCACTAATCATTTGAATGC                                                                     |
| icaR.SG-5                                                                                              | TTCTTATTTGAGTTTATTTTCGACATCG                                                                   |
| icaR.SG-3                                                                                              | CATAGAATTTTGCTATCTCTTACTTAATGATTG                                                              |
| gyrB.SG-5                                                                                              | ACGTATGAAGGTGGTACCGCATG                                                                        |
| gyrB.SG-3                                                                                              | ACGCGTTAATGCAGTGTGA                                                                            |
| <b>Transcriptional fusions for <i>icaR</i> and <i>icaADBC</i> promoters</b>                            |                                                                                                |
| icaA-pSA14-Fw (PstI)                                                                                   | CTGCAGCGTACATTCTAATATACCT                                                                      |
| icaA-pSA14-Rv (BamHI)                                                                                  | GGATCCTAAGCCATATGGTAATTGATAG                                                                   |
| <b>Constitutive expression of <i>icaR</i> and <i>icaRmΔ3'-UTR</i> mRNAs</b>                            |                                                                                                |
| IcaR+1 (BamHI)                                                                                         | GGATCCGAAATATTTGTAATTGCA                                                                       |
| IcaR-Term (EcoRI)                                                                                      | GAATTCCTTTTAAAAAGATGTGGGTA                                                                     |
| <b>Constitutive expression of 3XFLAG IcaR protein</b>                                                  |                                                                                                |
| IcaR+1 (BamHI)                                                                                         | GGATCCGAAATATTTGTAATTGCA                                                                       |
| IcaR-3XFLAG-DCHA                                                                                       | GACTACAAAGACCATGACGGTGATTATAAAGATCATGATATCGACTACAAAGATGACGACG<br>ATAAAAAGGATAAGATTATTGATAACGCA |
| IcaR-3XFLAG-IZDA                                                                                       | ATGATCTTTATAATCACCGTCATGGTCTTTGTAGTCCAATTTTATAACCCCTACT                                        |
| IcaR-Term (EcoRI)                                                                                      | GAATTCCTTTTAAAAAGATGTGGGTA                                                                     |
| <b>Constitutive expression of <i>icaR</i> mRNA carrying the UCCCCUG motif deletion</b>                 |                                                                                                |
| DEL-AntiRBS-IZDA-2                                                                                     | TGACAACCTATTCTTTTACATTACACTTTTATAAATATGTTCAA                                                   |
| DEL-AntiRBS-DCHA                                                                                       | ATGTAAAAGAATAAGTTGTCATCTAATTACA                                                                |
| <b>Constitutive expression of <i>icaR</i> mRNA carrying the UCCCCUG motif substitution</b>             |                                                                                                |
| SUBST-AntiRBS-IZDA-2                                                                                   | TGACAACCTATTCTTTTGTCCCCTACATTACACTTTTATAAATATGTTCAA                                            |
| SUBST-AntiRBS-DCHA                                                                                     | ATGTAGGGGACAAAAGAATAAGTTGTCATCTAATTACA                                                         |
| <b>Constitutive expression of <i>icaR</i> mRNA carrying the compensatory mutation at the SD region</b> |                                                                                                |
| SUBST-RBS-DCHA                                                                                         | CAGGTCCCCTTTATAAAAATTGAAGGATAAG                                                                |
| SUBST-RBS-IZDA                                                                                         | CAATTTTATAAAGGGGACCTGAAAATTAATCACACTATGTTAC                                                    |

Continued on following page

**Table S3. Continued**

---

**Synthesis of the substrates for in vitro assays**

|                       |                                                         |
|-----------------------|---------------------------------------------------------|
| RNA T7 icaR +1        | <u>TAATACGACTCACTATAGGGG</u> AAATATTTGTAATTGCAACTTAATTT |
| RP 5'UTR icaR RV      | CTCTGAAAATAAGGTTATTGCG                                  |
| RNA T7 3'UTR ucccc Fw | <u>TAATACGACTCACTATAGGGC</u> TTTATATTTGTGAATGGTTAAGT    |
| RP3'UTR ucccc Rv      | TTCCATTTTCATCTAATTTATGCGG                               |

**Production of Recombinant RNase III**

|                      |                                               |
|----------------------|-----------------------------------------------|
| RNase III Fw (NdeI)  | <u>GGAATTCC</u> CATATGTCTAAACAAAAGAAAAGTGAG   |
| RNase III Rv (BamHI) | <u>CGCGGATCC</u> CTATTTAATTTGTTTTAATTGCTTATAG |

**mRACE for mapping of processing sites at the 3'-UTR**

|                  |                                    |
|------------------|------------------------------------|
| RACE-Frag-400-RT | TTCATCTAATTTATGCGGATTCCTG          |
| icaR-C (Sall)    | <u>GTCGACTAATTTATTGATAAGCGCCTA</u> |

**Toeprint**

|              |                                                                  |
|--------------|------------------------------------------------------------------|
| IcaR Forward | GGGAAATATTTGTAATTGCAACTTAATTTTCC                                 |
| IcaR Reverse | TCCAT <u>GGATCC</u> AAAAAAGCGCCTATGTCATGATTAC                    |
| T7 5'UTR     | <u>TAATACGACTCACTATAGGG</u> AAATATTTGTAATTGCCAACTTAATTT          |
| IcaR 5' rev  | ATCATCAAGTGTGTACCGTCATACCCCTT                                    |
| T7 3'UTR     | <u>TAATACGACTCACTATAGGGC</u> TTTATATTTGTGAATGGTTAAGTTTGTCTTTGAAC |
| IcaR 3' term | AAAAAGCGCCTATGTCATGATTTACCATCA                                   |
| spa          | TTTGACGACAGGTGTTACGCC                                            |

---

*Italic, restriction enzyme site included in the oligonucleotide. Underlined, T7 promoter*
